# Supplementary material for: Water-soluble dendritic polyaspartic porphyrins: potential photosensitizers for photodynamic therapy
Source: Royal Society of Chemistry journal article supplement (doi:10.1039/c1nj20733d), 2011-10-31
Supplement: c1nj20733d.pdf [file c1nj20733d.pdf]

## Water-soluble Dendritic Polyaspartic Porphyrins: Potential Photosensitizers for Photodynamic Therapy

Baoxiang Gao,<sup>\* a, c</sup> Huijuan Yin,<sup>b</sup> Yueling Liu,<sup>a</sup> Yingxin Li,<sup>\*b</sup> Qianqian Bai,<sup>a</sup> Licui Zhang<sup>a</sup>

<sup>a</sup> College of Chemistry and Environmental Science, Hebei University, Baoding, 071002, P. R. China. Fax: +86 3125079317, E-mail: [bxgao@hbu.edu.cn](mailto:bxgao@hbu.edu.cn)

<sup>b</sup> Institute of Biomedical Engineering, Chinese Academy of Medical Science & Peking Union Medical College, Tianjin, 300192, P. R. China. Fax: +86 22 87891131, E-mail: [yingxinli@bme.org.cn](mailto:yingxinli@bme.org.cn)

<sup>c</sup> Key Laboratory of Medicinal Chemistry and Molecular Diagnosis, Ministry of Education, Hebei University, Baoding, 071002, P. R. China.

### H-NMR spectrum of new compounds

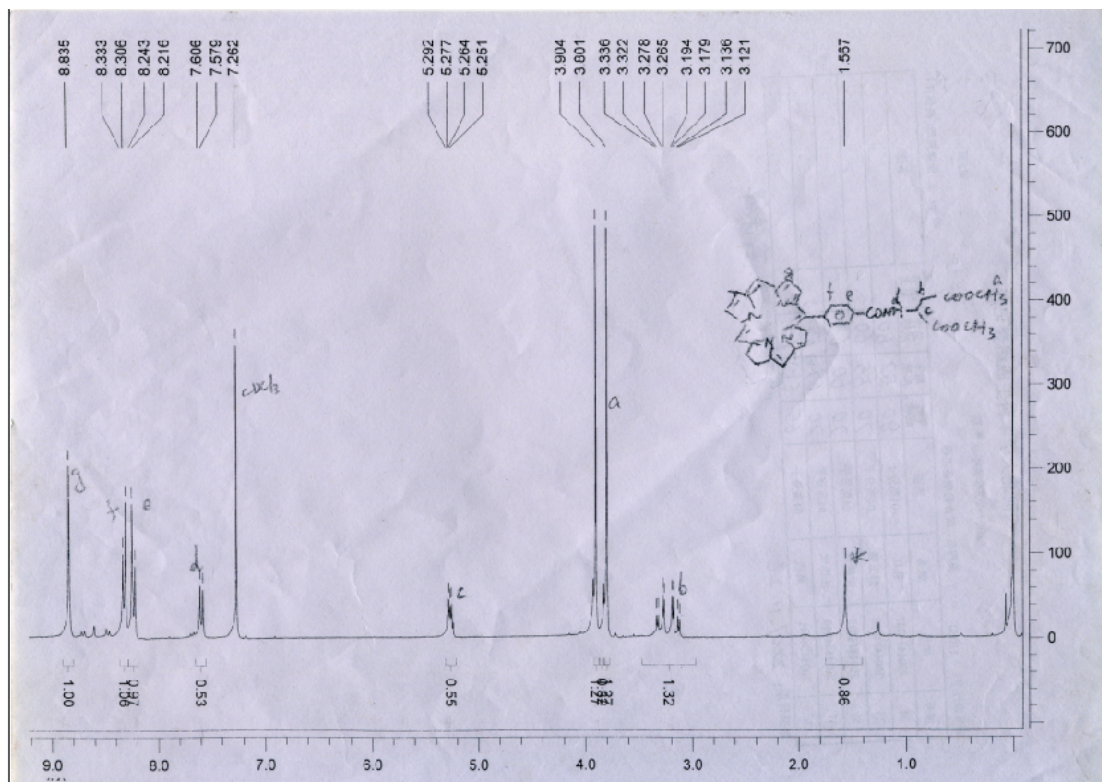

<sup>1</sup>H-NMR spectrum of compound **P1-OCH3** in CDCl<sub>3</sub>

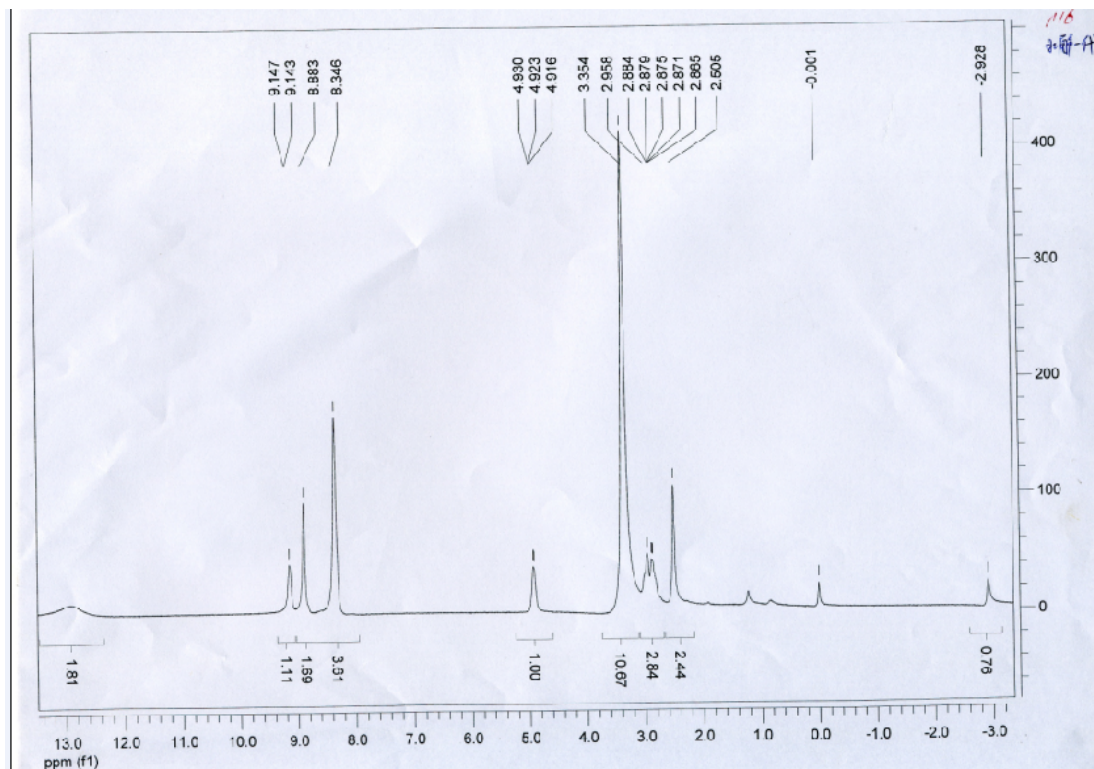

<sup>1</sup>H-NMR spectrum of compound **P1-COOH** in DMSO

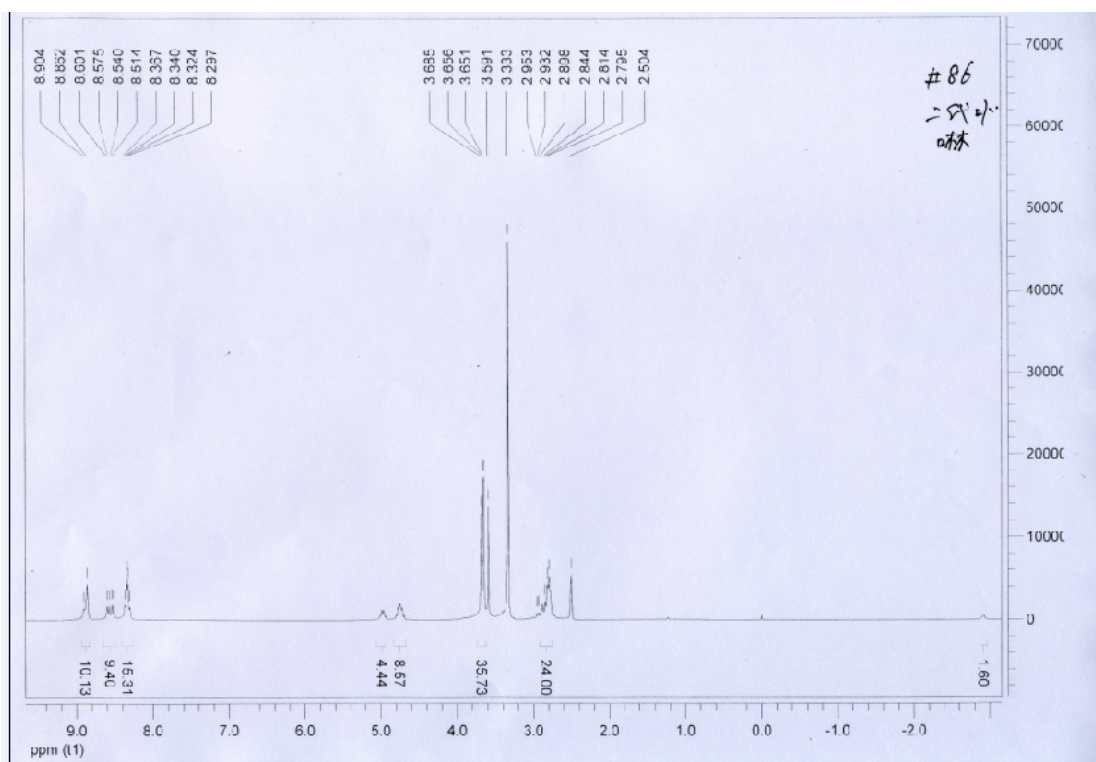

$^1\text{H-NMR}$  spectrum of compound **P2-OCH<sub>3</sub>** in  $\text{CDCl}_3$

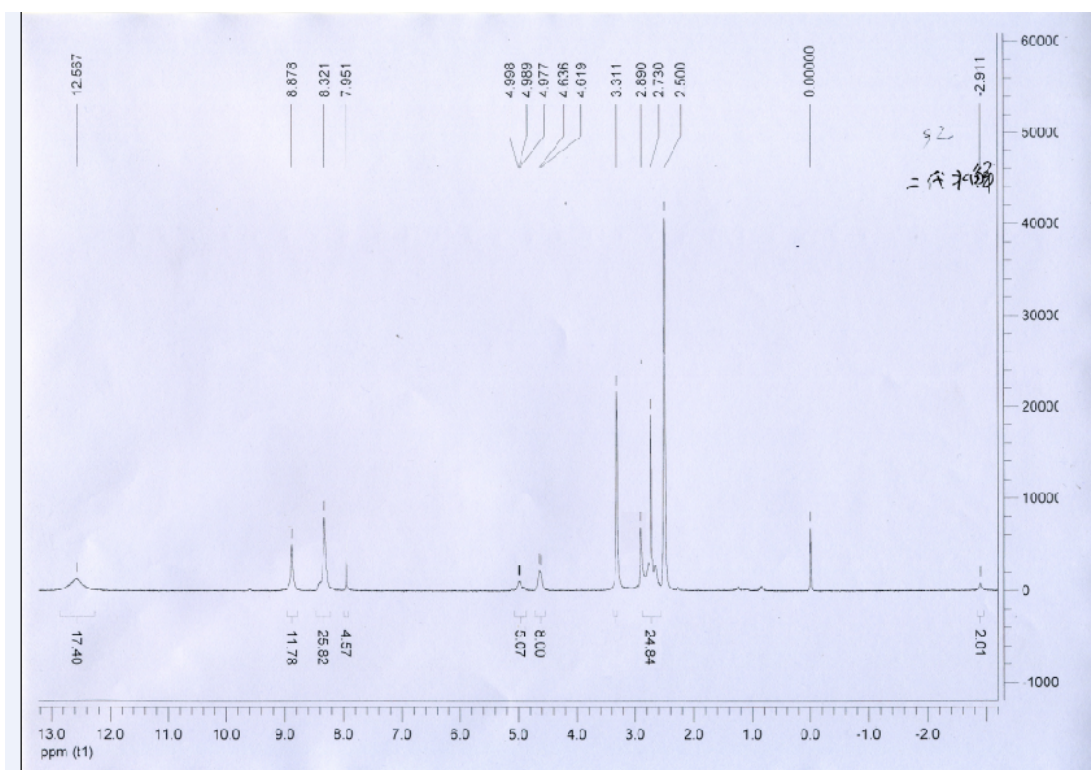

$^1\text{H-NMR}$  spectrum of compound **P2-COOH** in  $\text{DMSO}$

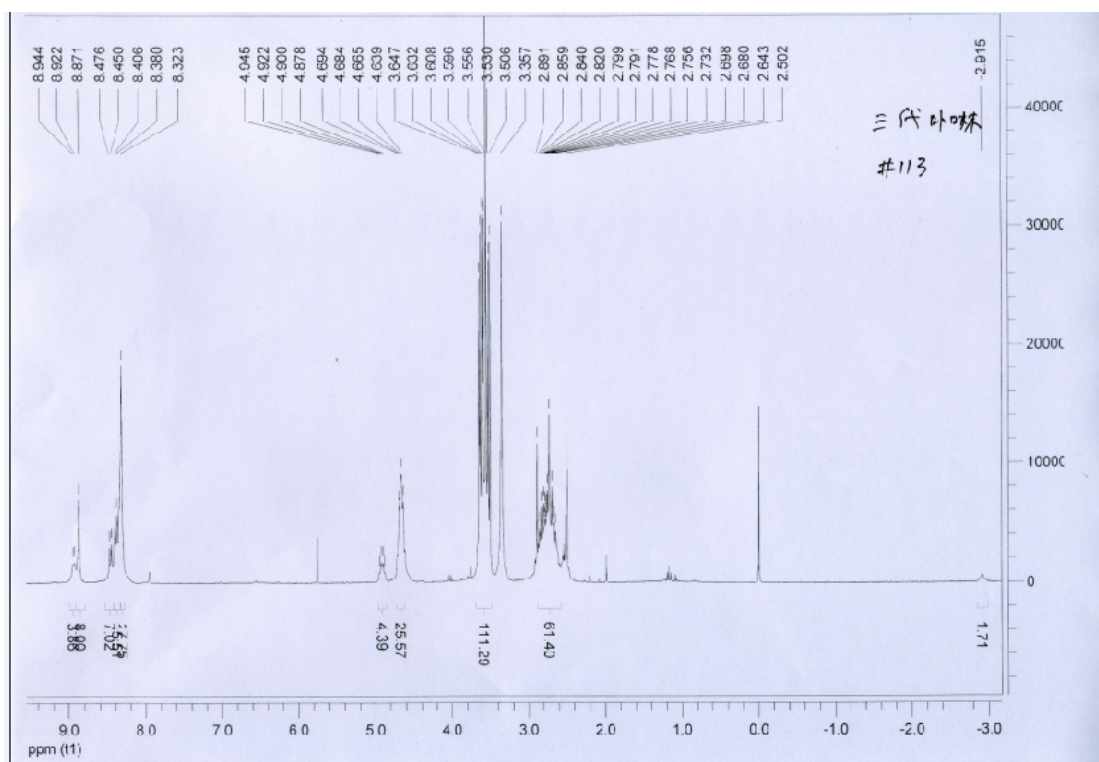

$^1\text{H-NMR}$  spectrum of compound **P3-OCH<sub>3</sub>** in DMSO

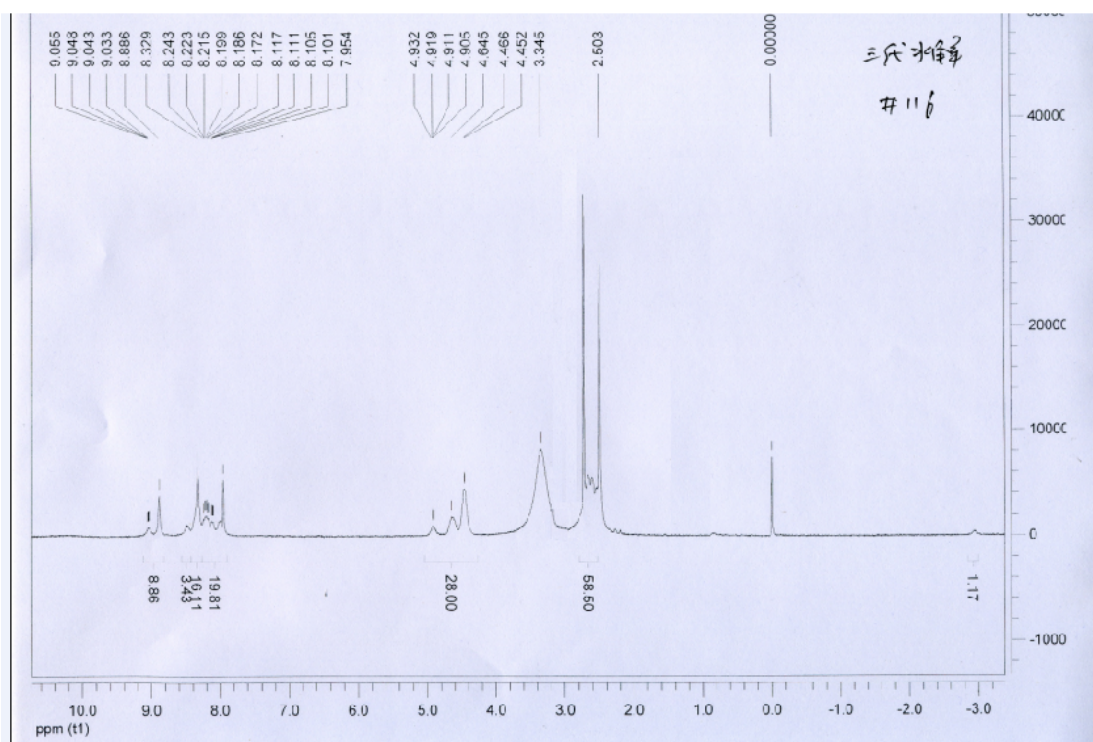

$^1\text{H-NMR}$  spectrum of compound **P3-COOH** in DMSO

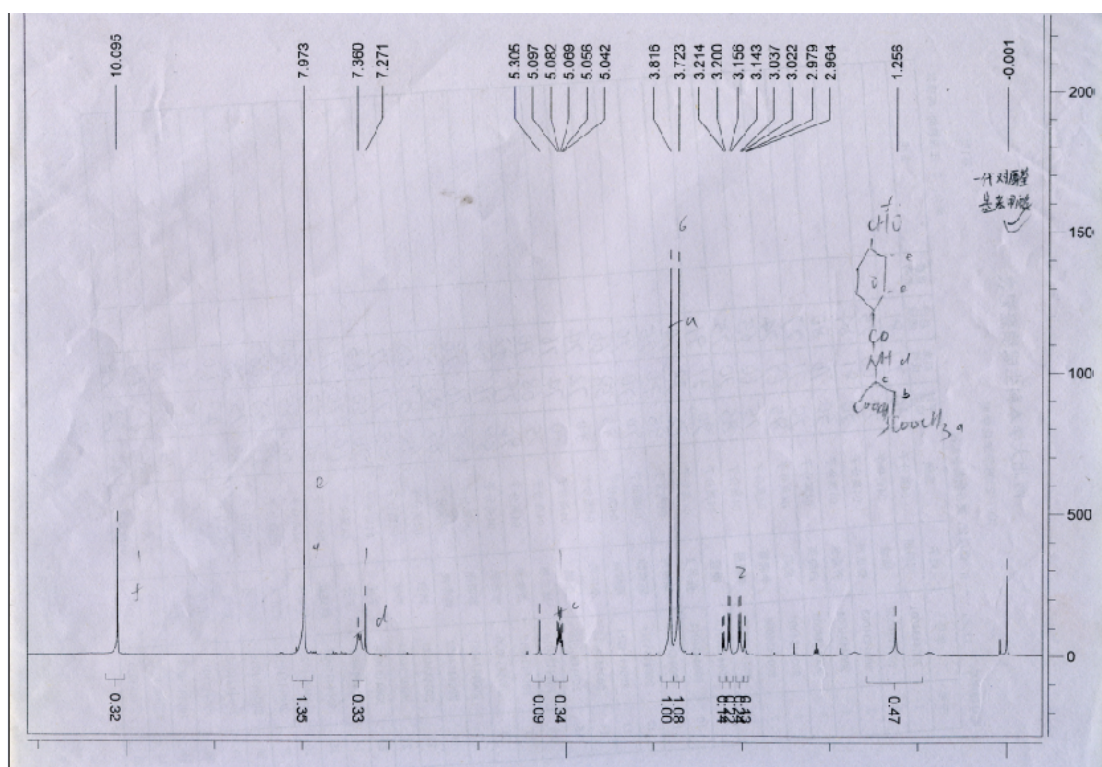

<sup>1</sup>H-NMR spectrum of compound **5** in CDCl<sub>3</sub>

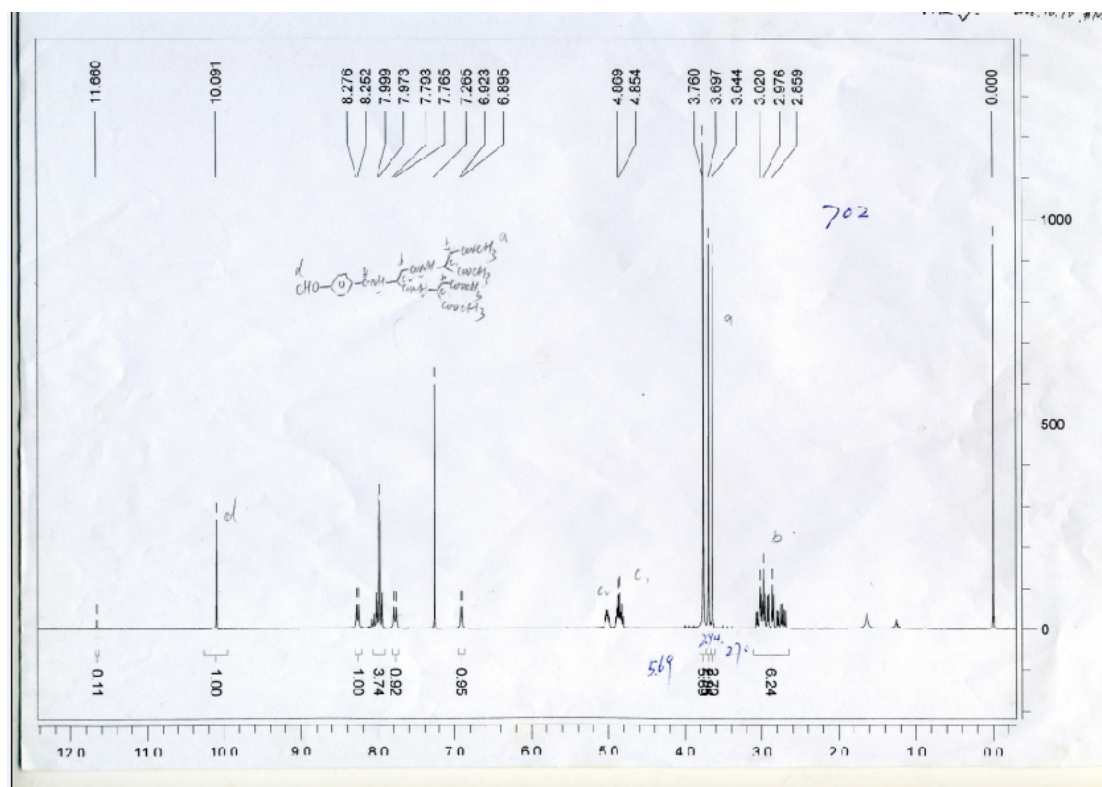

<sup>1</sup>H-NMR spectrum of compound **6** in CDCl<sub>3</sub>

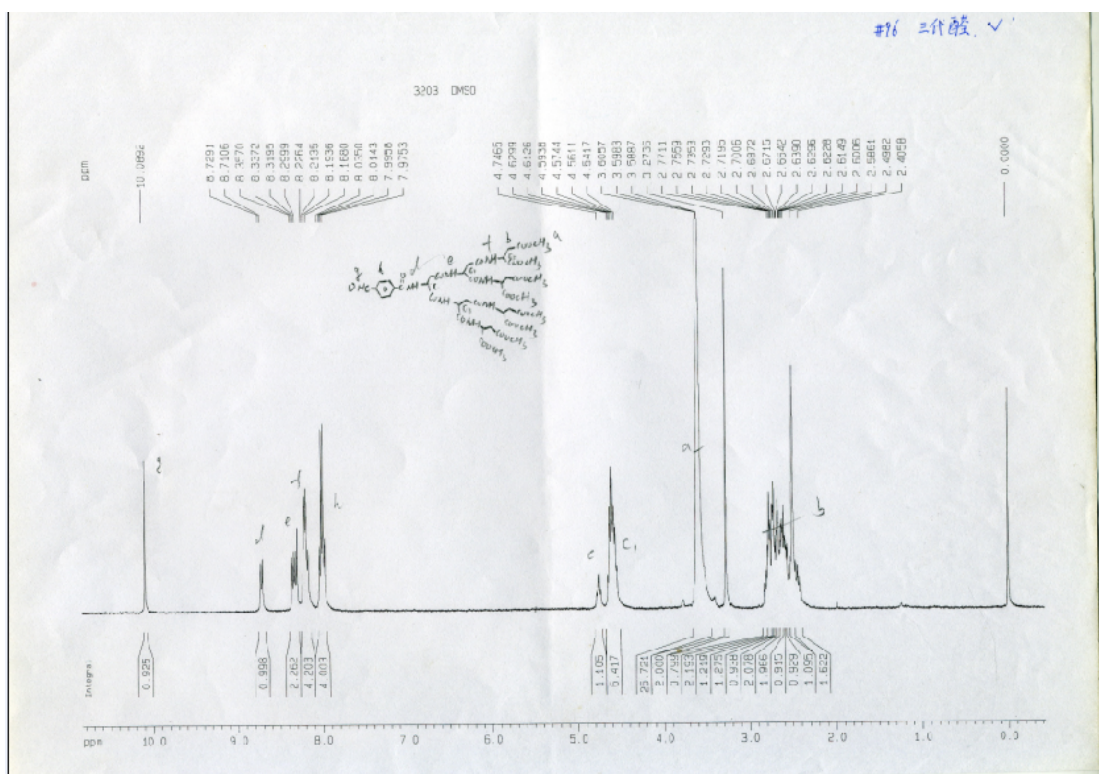

$^1\text{H-NMR}$  spectrum of compound **7** in  $\text{CDCl}_3$
